# Supplementary material
Source: publisher site journal article supplement (https://www.dovepress.com/article/555228)
Supplement: Supplementary file 1 [file Supplementary%20figures.pdf]

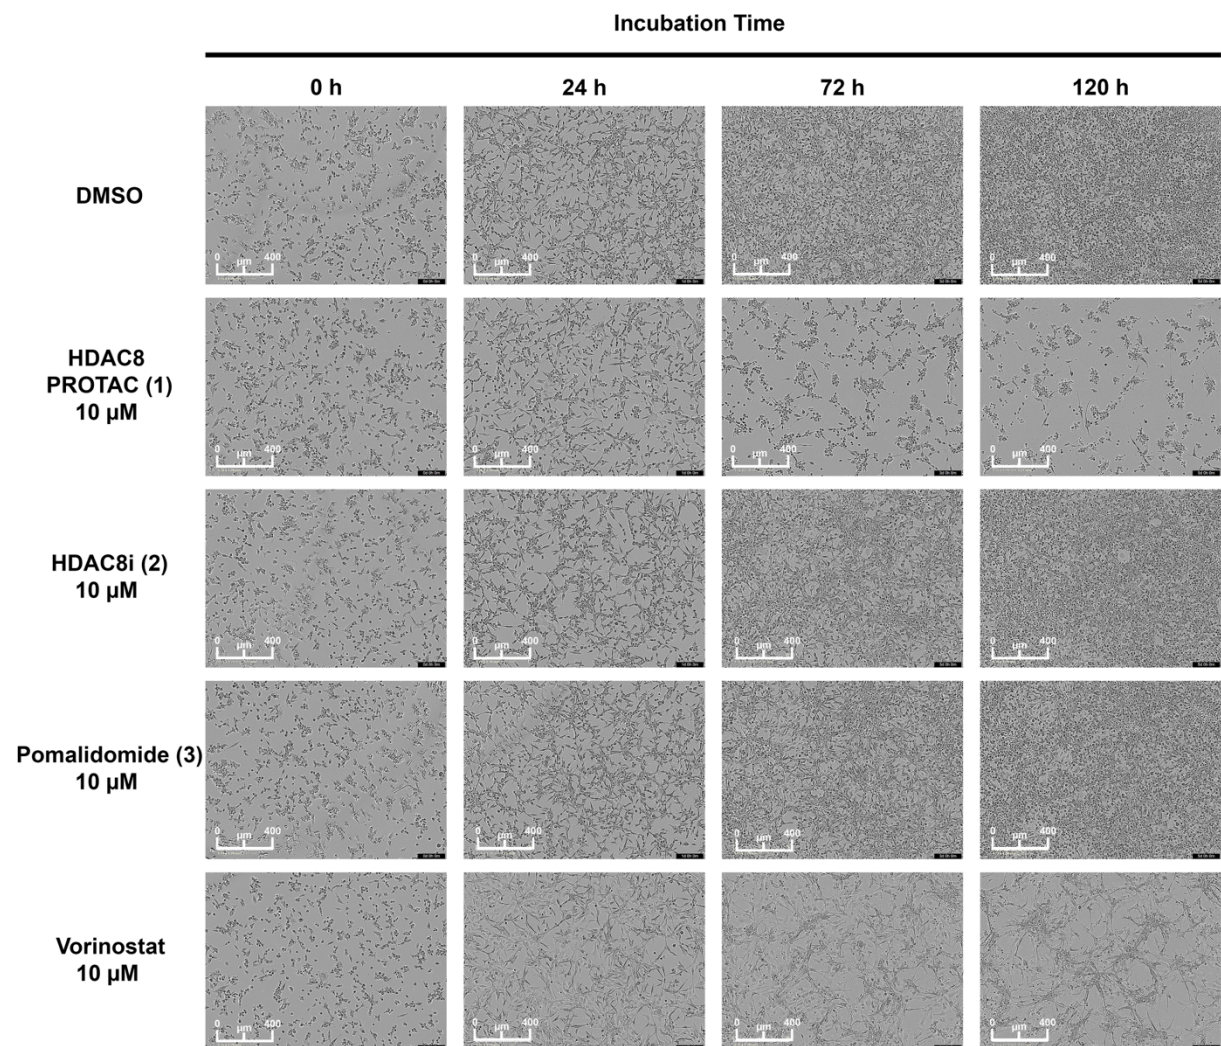

**Supplementary figure 1** Representative bright-field images of U-87 MG cells after treatment with DMSO, 10  $\mu$ M HDAC8 PROTAC (**1**), 10  $\mu$ M HDAC8i (**2**), 10  $\mu$ M pomalidomide (**3**), and 10  $\mu$ M vorinostat at indicated time point captured via Incucyte®.

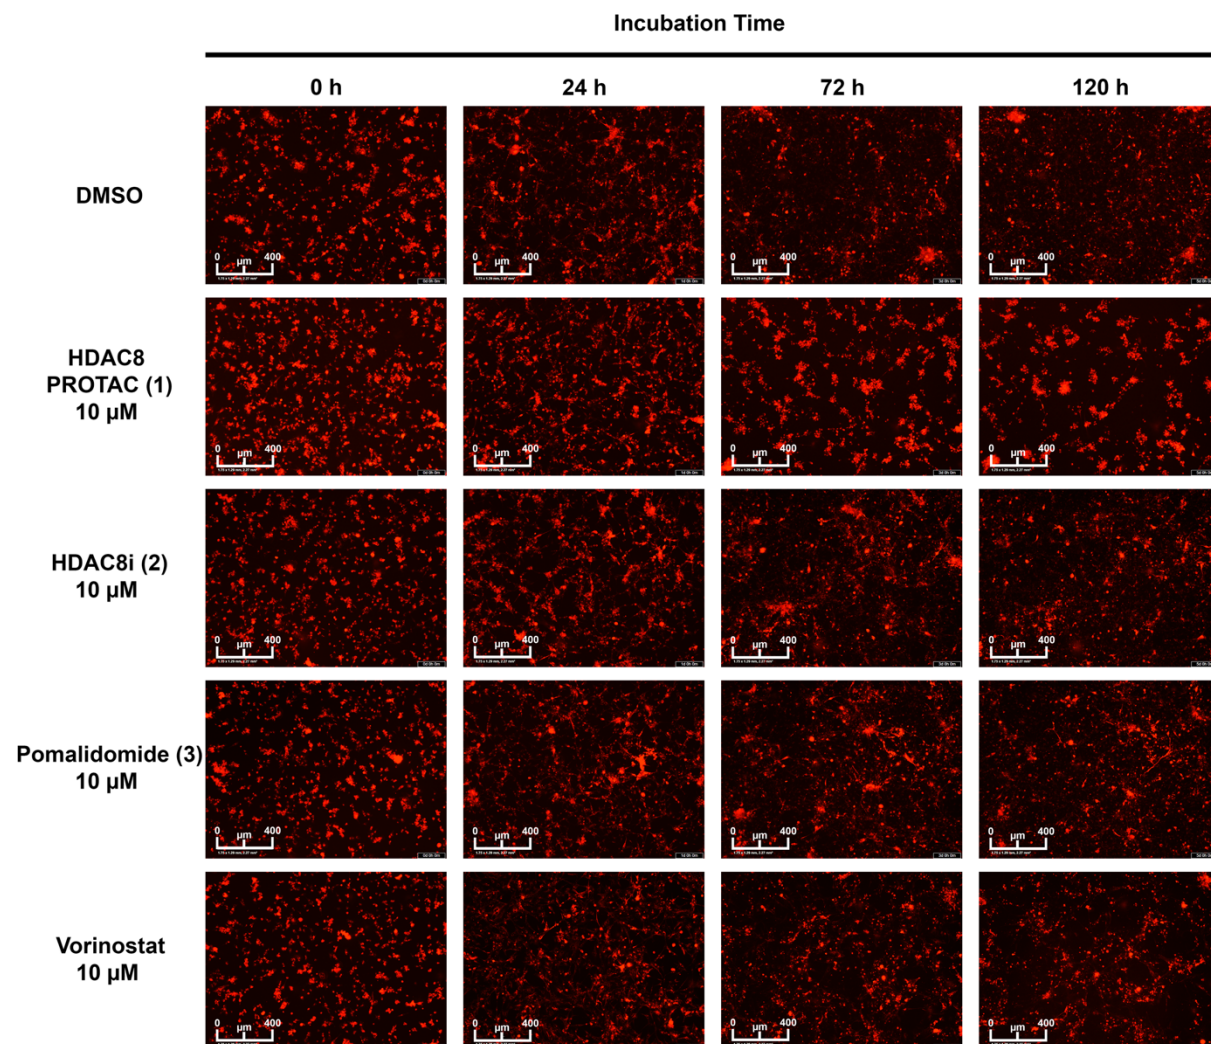

**Supplementary figure 2** Representative fluorescence images of U-87 MG cells after treatment with DMSO, 10 μM HDAC8 PROTAC (1), 10 μM HDAC8i (2), 10 μM pomalidomide (3), and 10 μM vorinostat at indicated time point captured via Incucyte®.
